# Supplementary material
Source: PubMed Central journal article supplement (PMC4268340)

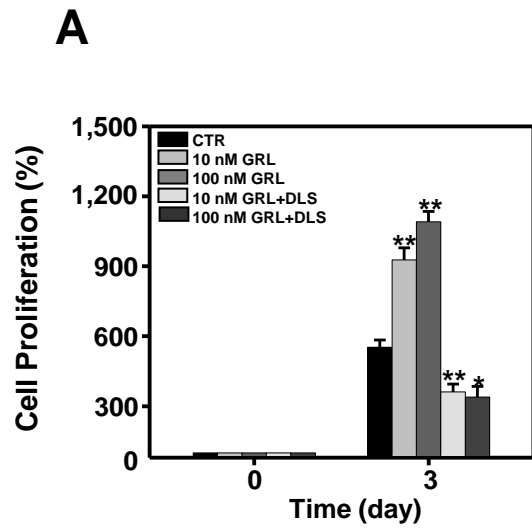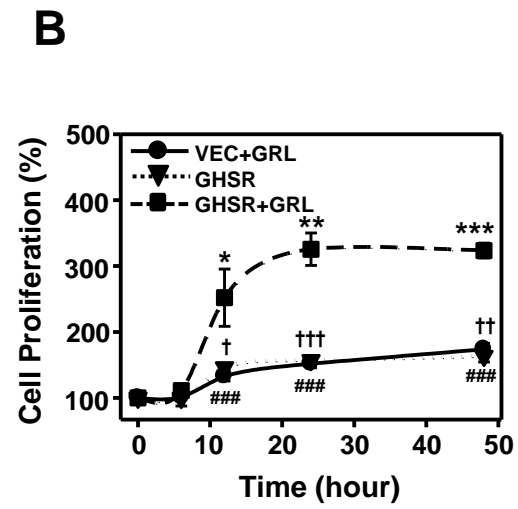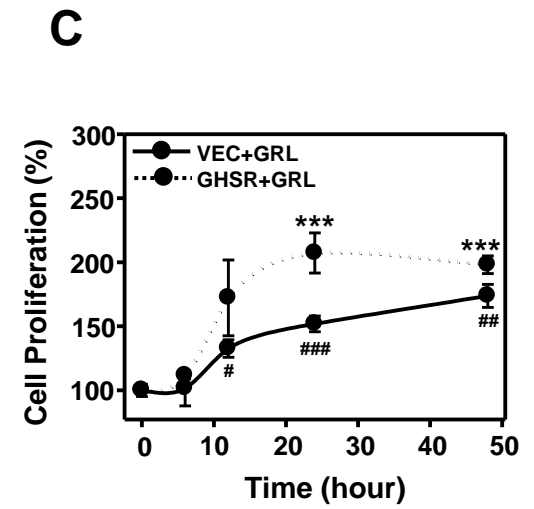

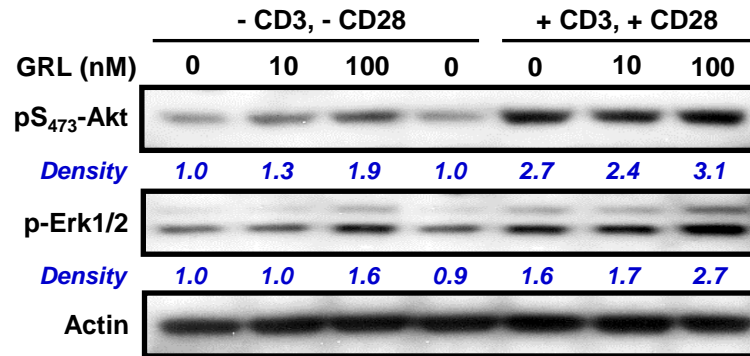

Supplement: NIHMS643381-supplement-1.pdf [file NIHMS643381-supplement-1.pdf]
